# Supplementary material for: Visible light-catalytic hydroxylation of aryl halides with water to phenols by carbon nitride and nickel complex cooperative catalysis
Source: Royal Society of Chemistry journal article supplement (doi:10.1039/d0gc02367a), 2020-01-01

## Supporting Information

### Visible Light-Catalytic Hydroxylation of Aryl Halides with Water to Phenols by Carbon Nitride and Nickel Complex Cooperative Catalysis

Kaixuan Wang,<sup>a, b</sup> Min Tong,<sup>b</sup> Yanan Yang,<sup>b</sup> Bingyu Zhang,<sup>b</sup> Helong Liu,<sup>b</sup> Hexing  
Li\*<sup>a, b</sup> and Fang Zhang\*<sup>b</sup>

<sup>a</sup>School of Chemistry and Molecular Engineering, East China University of  
Science and Technology, 130 Meilong Road, 200237, Shanghai, China

<sup>b</sup>The Education Ministry Key Lab of Resource Chemistry and Shanghai Key  
Laboratory of Rare Earth Functional Materials, Shanghai Normal University,  
Shanghai 200234, China

\* Email: [hexing-li@shnu.edu.cn](mailto:hexing-li@shnu.edu.cn); [zhangfang@shnu.edu.cn](mailto:zhangfang@shnu.edu.cn);

–

**Table S1.** Catalytic performances of different photocatalyst in the synthesis of phenol from 4-bromobenzonitrile.<sup>a</sup>

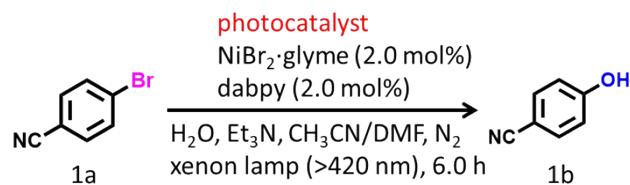

| Entry | PC                               | Conversion (%) | Yield (%) <sup>b</sup> |
|-------|----------------------------------|----------------|------------------------|
| 1     | Cu <sub>2</sub> O                | trace          | trace                  |
| 2     | WO <sub>3</sub>                  | trace          | trace                  |
| 3     | α-Fe <sub>2</sub> O <sub>3</sub> | trace          | trace                  |
| 4     | CdS                              | 5.10           | 4.20                   |
| 5     | g-C <sub>3</sub> N <sub>4</sub>  | 67.1           | 66.5                   |

<sup>a</sup>Reaction conditions: 4-bromobenzonitrile (1a) (91.1 mg, 0.5 mmol, 1.0 equiv), NiBr<sub>2</sub>·glyme (2.0 mol%), dabpy (2.0 mol%), photocatalyst (50 mg), DMF/CH<sub>3</sub>CN (1:1, 3.0 mL), H<sub>2</sub>O (360 μL, 20 equiv), Et<sub>3</sub>N (0.75 mmol, 1.5 equiv), N<sub>2</sub>, xenon lamp (>420 nm), 25 °C. <sup>b</sup>Determined by HPLC analysis against an internal standard.

**Table S2.** Catalytic performances of different time in the synthesis of phenol from 4-bromobenzonitrile. <sup>a</sup>

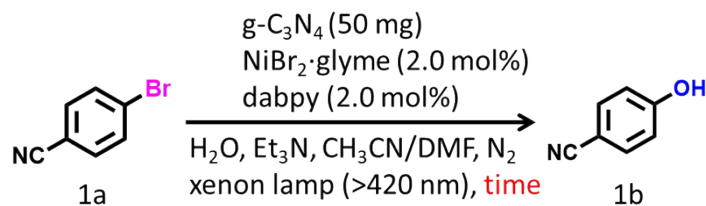

| Entry | Time (h) | Conversion (%) | Yield (%) <sup>b</sup> |
|-------|----------|----------------|------------------------|
| 1     | 2        | 18.3           | 17.1                   |
| 2     | 4        | 34.6           | 31.0                   |
| 3     | 6        | 67.1           | 66.5                   |
| 4     | 8        | 81.9           | 81.6                   |
| 5     | 10       | 94.3           | 94.0                   |
| 6     | 12       | 99.9           | 99.9                   |

<sup>a</sup>Reaction conditions: 4-bromobenzonitrile (1a) (91.1 mg, 0.5 mmol, 1.0 equiv),  $\text{NiBr}_2 \cdot \text{glyme}$  (2.0 mol%),  $\text{dabpy}$  (2.0 mol%),  $\text{g-C}_3\text{N}_4$ ,  $\text{DMF}/\text{CH}_3\text{CN}$  (1:1, 3.0 mL),  $\text{H}_2\text{O}$  (360  $\mu\text{L}$ , 20 equiv),  $\text{Et}_3\text{N}$  (0.75 mmol, 1.5 equiv),  $\text{N}_2$ , xenon lamp (>420 nm), <sup>b</sup>Determined by HPLC analysis against an internal standard.

**Table S3.** Catalytic performances of different base in the synthesis of phenol from 4-bromobenzonitrile. <sup>a</sup>

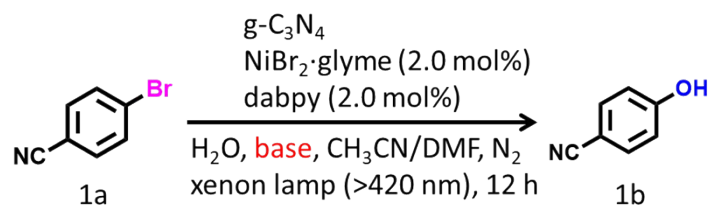

| Entry | Catalyst                 | Addition agent                  | Conversion (%) | Yield (%) <sup>b</sup> |
|-------|--------------------------|---------------------------------|----------------|------------------------|
| 1     | NiBr <sub>2</sub> ·glyme | DIPEA                           | 46.0           | 34.0                   |
| 2     | NiBr <sub>2</sub> ·glyme | dimethylphenylamine             | 9.50           | trace                  |
| 3     | NiBr <sub>2</sub> ·glyme | TEOA                            | 2.52           | 1.95                   |
| 4     | NiBr <sub>2</sub> ·glyme | Et <sub>3</sub> N               | 99.9           | 99.9                   |
| 5     | NiBr <sub>2</sub> ·glyme | DABCO                           | trace          | trace                  |
| 6     | NiBr <sub>2</sub> ·glyme | 2,6-lutidine                    | trace          | trace                  |
| 7     | NiBr <sub>2</sub> ·glyme | K <sub>2</sub> CO <sub>3</sub>  | 12.2           | trace                  |
| 8     | NiBr <sub>2</sub> ·glyme | Cs <sub>2</sub> CO <sub>3</sub> | trace          | trace                  |

<sup>a</sup>Reaction conditions: 4-bromobenzonitrile (1a) (91.1 mg, 0.5 mmol, 1.0 equiv), NiBr<sub>2</sub>·glyme (2.0 mol%), dabpy (2.0 mol%), g-C<sub>3</sub>N<sub>4</sub> (50 mg), DMF/CH<sub>3</sub>CN (1:1, 3.0 mL), H<sub>2</sub>O (360 μL, 20 equiv), base (0.75 mmol, 1.5 equiv), N<sub>2</sub>, xenon lamp (>420 nm), 25 °C, 12 h. <sup>b</sup>Determined by HPLC analysis against an internal standard.

**Table S4.** Catalytic performances of different nickel source in the synthesis of phenol from 4-bromobenzonitrile. <sup>a</sup>

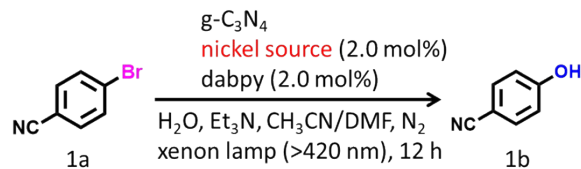

| Entry | Catalyst                             | Conversion (%) | Yield (%) <sup>b</sup> |
|-------|--------------------------------------|----------------|------------------------|
| 1     | NiBr <sub>2</sub> ·glyme             | 99.9           | 99.9                   |
| 2     | NiCl <sub>2</sub>                    | 50.5           | 50.1                   |
| 3     | NiCl <sub>2</sub> ·6H <sub>2</sub> O | 98.6           | 98.0                   |
| 4     | NiBr <sub>2</sub> ·3H <sub>2</sub> O | 59.2           | 58.1                   |
| 5     | NiBr <sub>2</sub>                    | 23.2           | 23.0                   |

<sup>a</sup>Reaction conditions: 4-bromobenzonitrile (1a) (91.1 mg, 0.5 mmol, 1.0 equiv), Ni(II) (2.0 mol%), dabpy (2.0 mol%), g-C<sub>3</sub>N<sub>4</sub> (50 mg), DMF/CH<sub>3</sub>CN (1:1, 3.0 mL), H<sub>2</sub>O (360 μL, 20 equiv), Et<sub>3</sub>N (0.75 mmol, 1.5 equiv), N<sub>2</sub>, xenon lamp (>420 nm), 25 °C, 12 h. <sup>b</sup>Determined by HPLC analysis against an internal standard.

**Table S5.** Catalytic performances of different solvent in the synthesis of phenol from 4-bromobenzonitrile. <sup>a</sup>

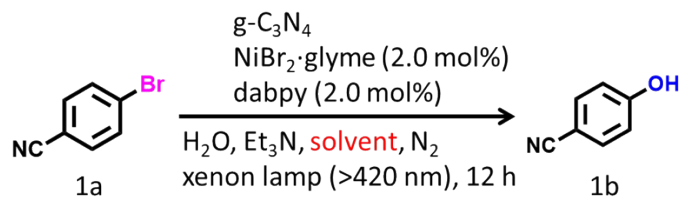

| Entry | Catalyst                         | Solvent                     | Conversion (%) | Yield (%) <sup>b</sup> |
|-------|----------------------------------|-----------------------------|----------------|------------------------|
| 1     | $\text{NiBr}_2\cdot\text{glyme}$ | DMF/ $\text{CH}_3\text{CN}$ | 99.9           | 99.9                   |
| 2     | $\text{NiBr}_2\cdot\text{glyme}$ | DMF                         | 65.9           | 64                     |
| 3     | $\text{NiBr}_2\cdot\text{glyme}$ | DMA/MeOH                    | 82.1           | 79.1                   |
| 4     | $\text{NiBr}_2\cdot\text{glyme}$ | $\text{H}_2\text{O}$        | 80.8           | 79.7                   |

<sup>a</sup>Reaction conditions: 4-bromobenzonitrile (1a) (91.1 mg, 0.5 mmol, 1.0 equiv),  $\text{NiBr}_2\cdot\text{glyme}$  (2.0 mol%), dabpy (2.0 mol%),  $\text{g-C}_3\text{N}_4$  (50 mg), solvent (3.0 mL),  $\text{H}_2\text{O}$  (360  $\mu\text{L}$ , 20 equiv),  $\text{Et}_3\text{N}$  (0.75 mmol, 1.5 equiv),  $\text{N}_2$ , xenon lamp (>420 nm), 25 °C, 12 h.

<sup>b</sup>Determined by HPLC analysis against an internal standard.

**Table S6.** Catalytic performances of different amount of solvent in the synthesis of phenol from 4-bromobenzonitrile. <sup>a</sup>

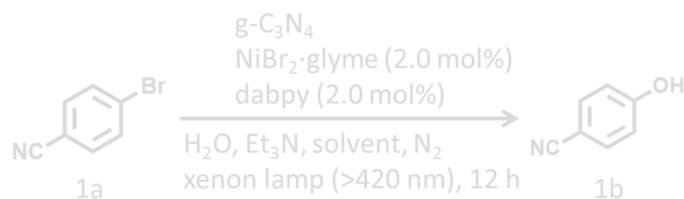

| Entry | Amount of solvent (mL) | Conversion (%) | Yield (%) <sup>b</sup> |
|-------|------------------------|----------------|------------------------|
| 1     | 2.0                    | 31.3           | 28.1                   |
| 2     | 3.0                    | 99.9           | 99.9                   |
| 3     | 4.0                    | 87.5           | 85.8                   |
| 4     | 5.0                    | 44.2           | 43.1                   |

<sup>a</sup>Reaction conditions: 4-bromobenzonitrile (1a) (91.1 mg, 0.5 mmol, 1.0 equiv),  $\text{NiBr}_2\cdot\text{glyme}$  (2.0 mol%),  $\text{dabpy}$  (2.0 mol%),  $g\text{-C}_3\text{N}_4$  (50 mg),  $\text{DMF}/\text{CH}_3\text{CN}$  (1:1),  $\text{H}_2\text{O}$  (360  $\mu\text{L}$ , 20 equiv),  $\text{Et}_3\text{N}$  (0.75 mmol, 1.5 equiv),  $\text{N}_2$ , xenon lamp (>420 nm), 25 °C, 12 h.

<sup>b</sup>Determined by HPLC analysis against an internal standard.

**Table S7.** Catalytic performances of different dosage of photocatalyst in the synthesis of phenol from 4-bromobenzonitrile. <sup>a</sup>

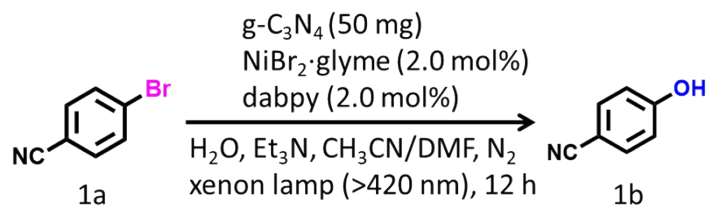

| Entry | $\text{g-C}_3\text{N}_4$ dosage (mg) | Conversion (%) | Yield (%) <sup>b</sup> |
|-------|--------------------------------------|----------------|------------------------|
| 1     | 20                                   | 51.9           | 50.4                   |
| 2     | 30                                   | 74.1           | 73.8                   |
| 3     | 40                                   | 88.3           | 86.2                   |
| 4     | 50                                   | 99.9           | 99.9                   |
| 5*    | 50                                   | 34.3           | 33.1                   |

<sup>a</sup>Reaction conditions: 4-bromobenzonitrile (1a) (91.1 mg, 0.5 mmol, 1.0 equiv),  $\text{NiBr}_2 \cdot \text{glyme}$  (2.0 mol%),  $\text{dabpy}$  (2.0 mol%),  $\text{g-C}_3\text{N}_4$ ,  $\text{DMF}/\text{CH}_3\text{CN}$  (1:1, 3.0 mL),  $\text{H}_2\text{O}$  (360  $\mu\text{L}$ , 20 equiv),  $\text{Et}_3\text{N}$  (0.75 mmol, 1.5 equiv),  $\text{N}_2$ , xenon lamp (>420 nm), 25 °C, 12 h.  
<sup>b</sup>Determined by HPLC analysis against an internal standard. \*  $\text{NiBr}_2 \cdot \text{glyme}$  (1.0 mol%)



**Table S8.** Catalytic performances of light intensity in the synthesis of phenol from 4-bromobenzonitrile. <sup>a</sup>

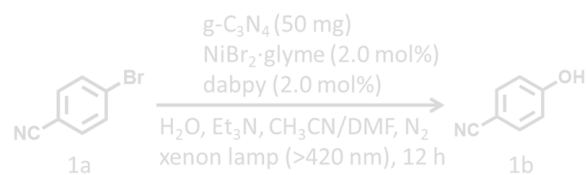

| Entry | Power (W) | Conversion (%) | Yield (%) <sup>b</sup> |
|-------|-----------|----------------|------------------------|
| 1     | 100       | 12.1           | 11.5                   |
| 3     | 150       | 20.4           | 20.1                   |
| 4     | 200       | 58.1           | 57.6                   |
| 5     | 300       | 99.9           | 99.9                   |

<sup>a</sup>Reaction conditions: 4-bromobenzonitrile (1a) (91.1 mg, 0.5 mmol, 1.0 equiv),  $\text{NiBr}_2 \cdot \text{glyme}$  (2.0 mol%), dabpy (2.0 mol%),  $g\text{-C}_3\text{N}_4$  (50 mg),  $\text{DMF}/\text{CH}_3\text{CN}$  (1:1, 3.0 mL),  $\text{H}_2\text{O}$  (360  $\mu\text{L}$ , 20 equiv),  $\text{Et}_3\text{N}$  (0.75 mmol, 1.5 equiv),  $\text{N}_2$ , xenon lamp (>420 nm), 25 °C, 12 h. <sup>b</sup>Determined by HPLC analysis against an internal standard.

**Table S9** Reaction scope of Nidabpy/g-C<sub>3</sub>N<sub>4</sub> catalyzed hydroxylation of aromatic halides.<sup>a</sup>

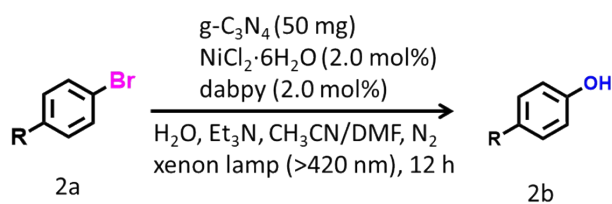

| Entry | Substrate | Conversion (%) | Yield (%) <sup>b</sup> |
|-------|-----------|----------------|------------------------|
| 1     |           | 98.6           | 98.0                   |
| 2     |           | 91.1           | 88.2                   |
| 3     |           | 29.5           | 22.1                   |
| 4     |           | 50.1           | 49.0                   |
| 5     |           | 44.9           | 41.7                   |

<sup>a</sup>Reaction conditions: aromatic halide (2a) (0.5 mmol, 1.0 equiv), NiCl<sub>2</sub>·6H<sub>2</sub>O (2.0 mol%), dabpy (2.0 mol%), g-C<sub>3</sub>N<sub>4</sub> (50 mg), DMF/CH<sub>3</sub>CN (1:1, 3.0 mL), H<sub>2</sub>O (360 μL, 20 equiv), Et<sub>3</sub>N (0.75 mmol, 1.5 equiv), N<sub>2</sub>, xenon lamp (>420 nm), 25°C, 12 h. <sup>b</sup>Determined by HPLC analysis against an internal standard.

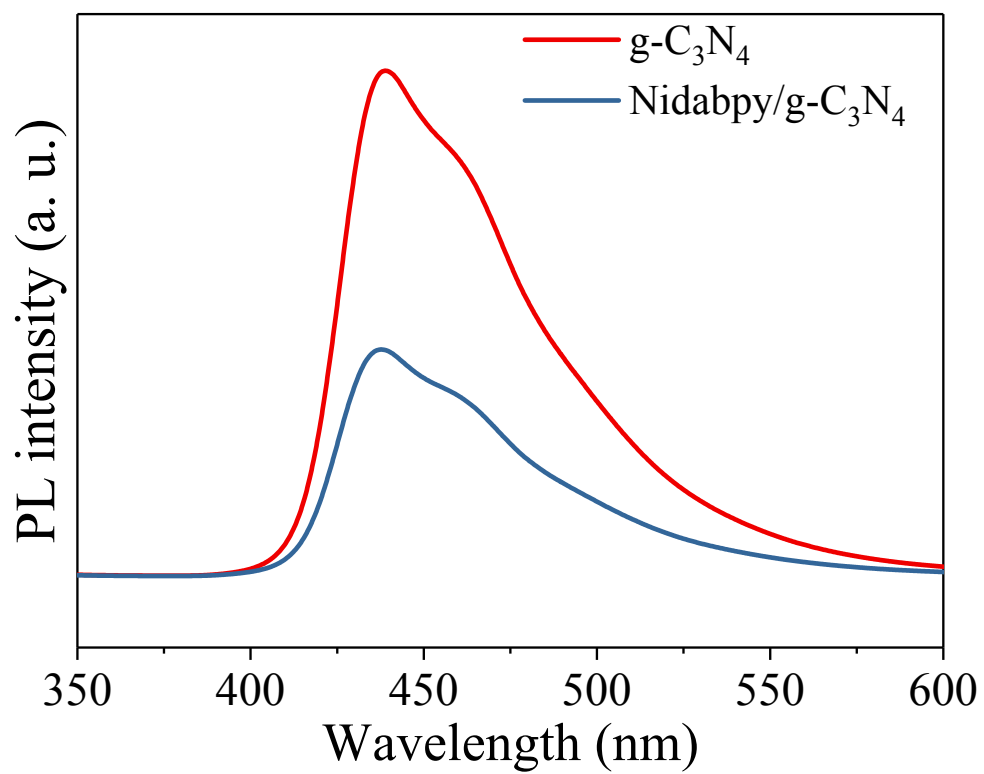

**Figure S1** Photoluminescence (PL) spectra of Nidabpy/g-C<sub>3</sub>N<sub>4</sub> and g-C<sub>3</sub>N<sub>4</sub> samples.

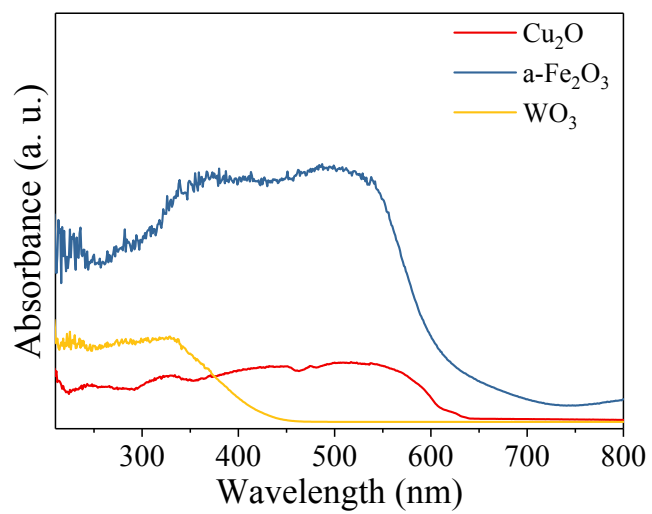

**Figure S2.** UV-Vis spectra of Cu<sub>2</sub>O, a-Fe<sub>2</sub>O<sub>3</sub> and WO<sub>3</sub> samples.

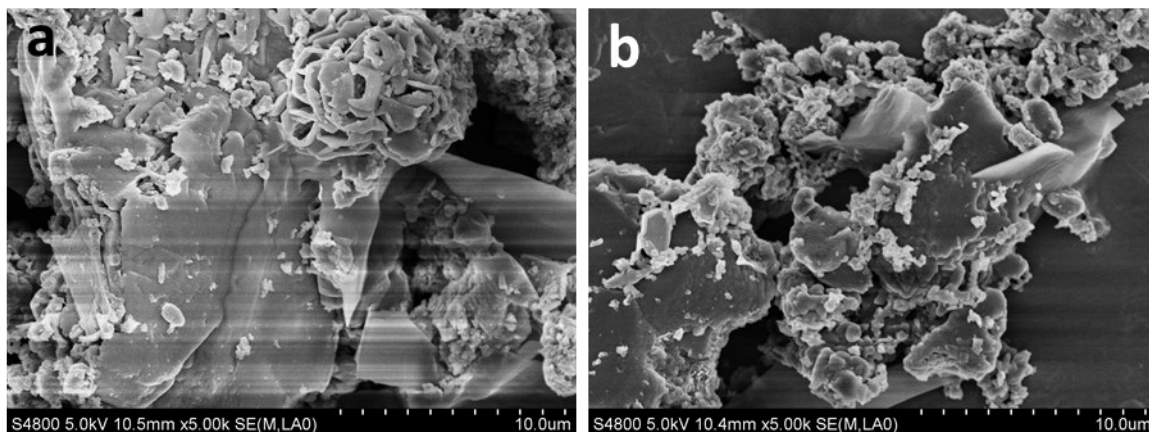

**Figure S3.** SEM images of g-C<sub>3</sub>N<sub>4</sub> before and after the reaction.

## NMR spectra of the compounds

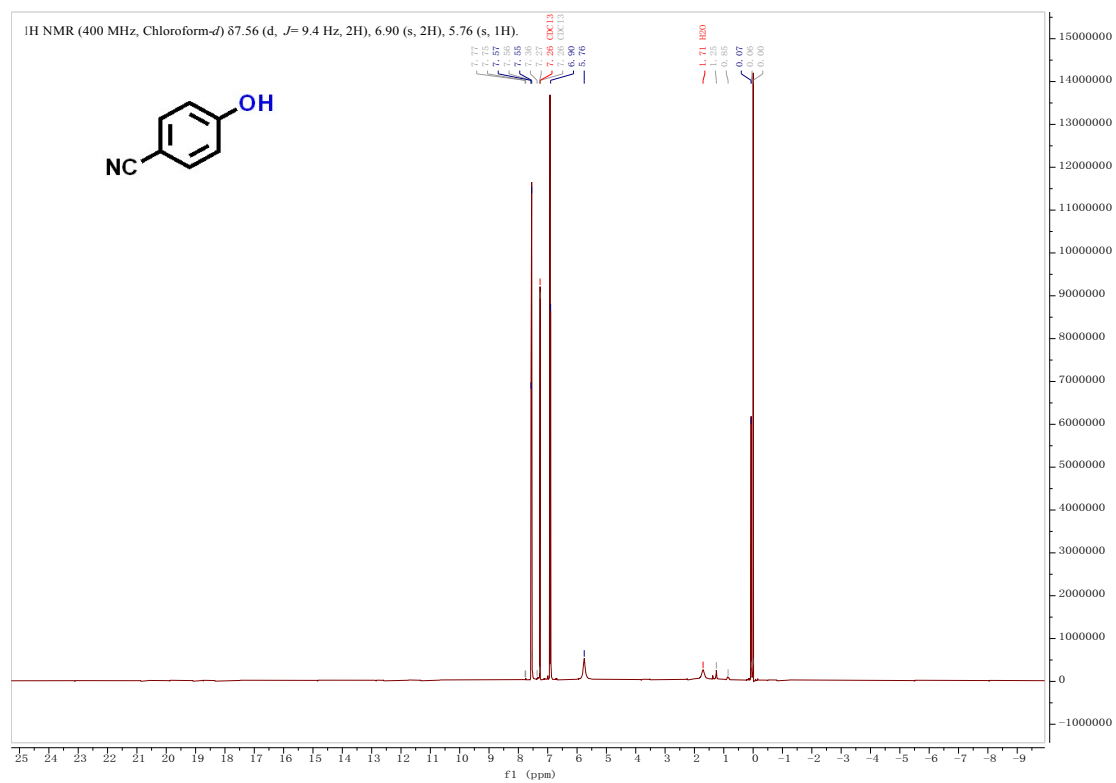

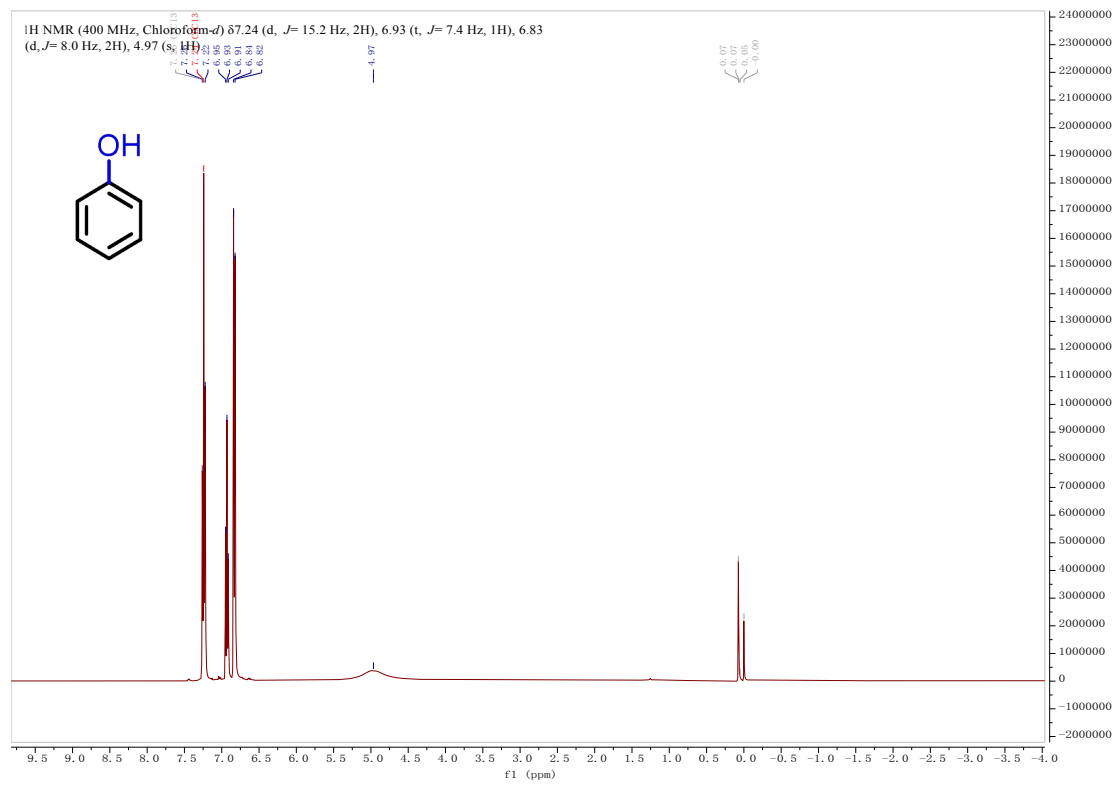

<sup>1</sup>H NMR (400 MHz, Chloroform-*d*) 8.22 – 8.14 (m, 2H), 6.91 (d, *J* = 9.3 Hz, 2H), 5.57 (s, 1H).

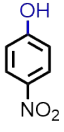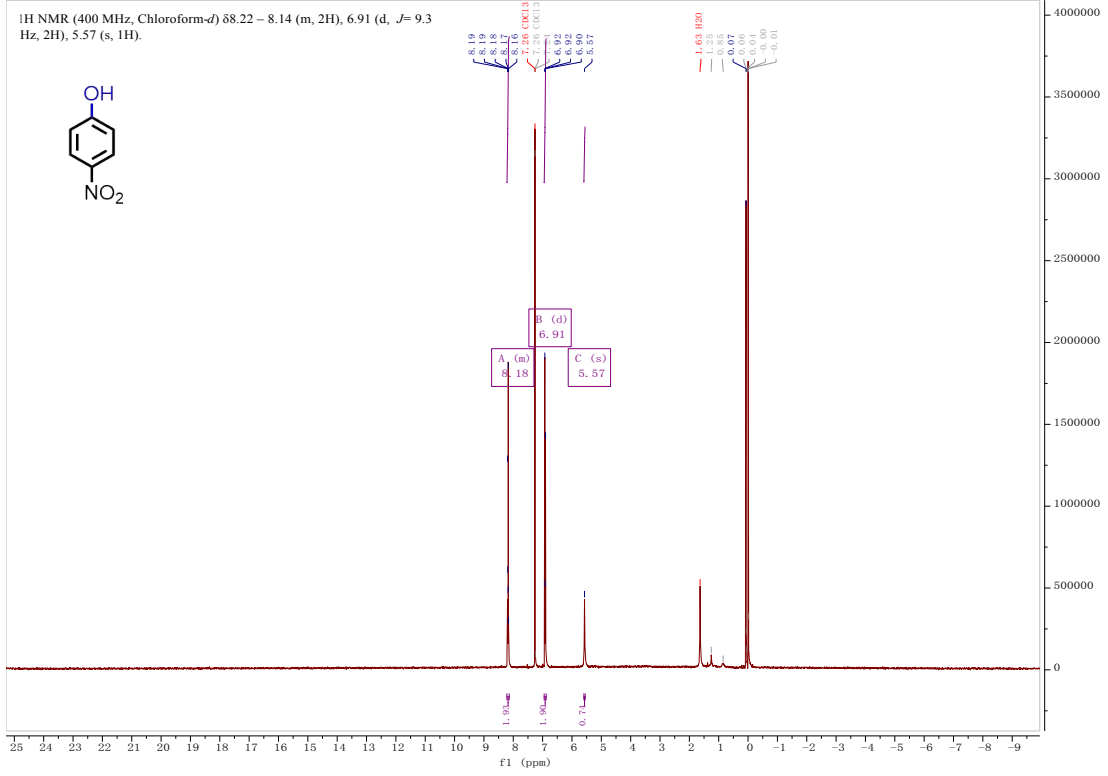



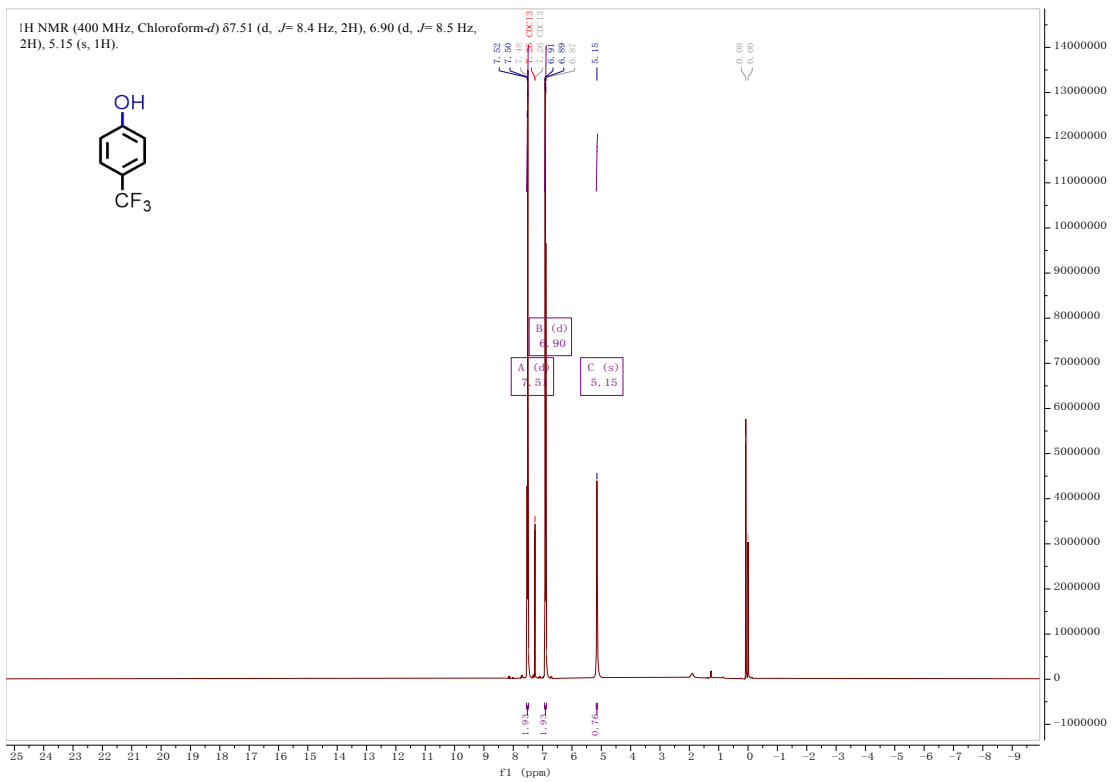

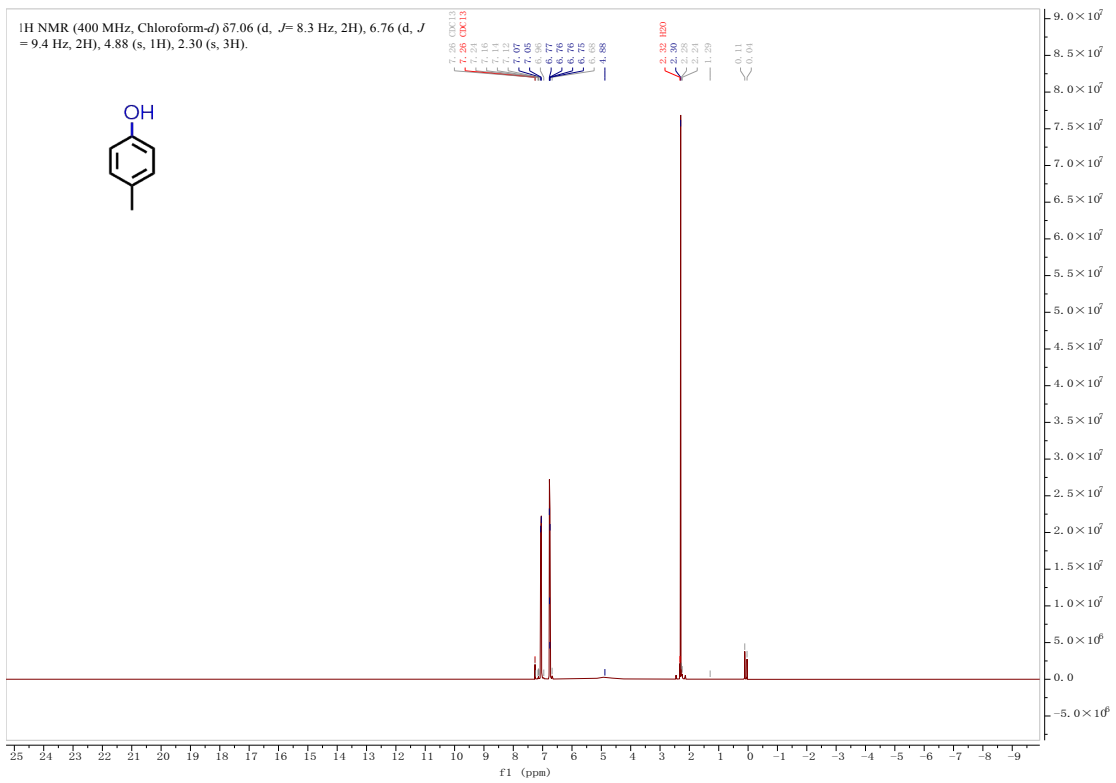

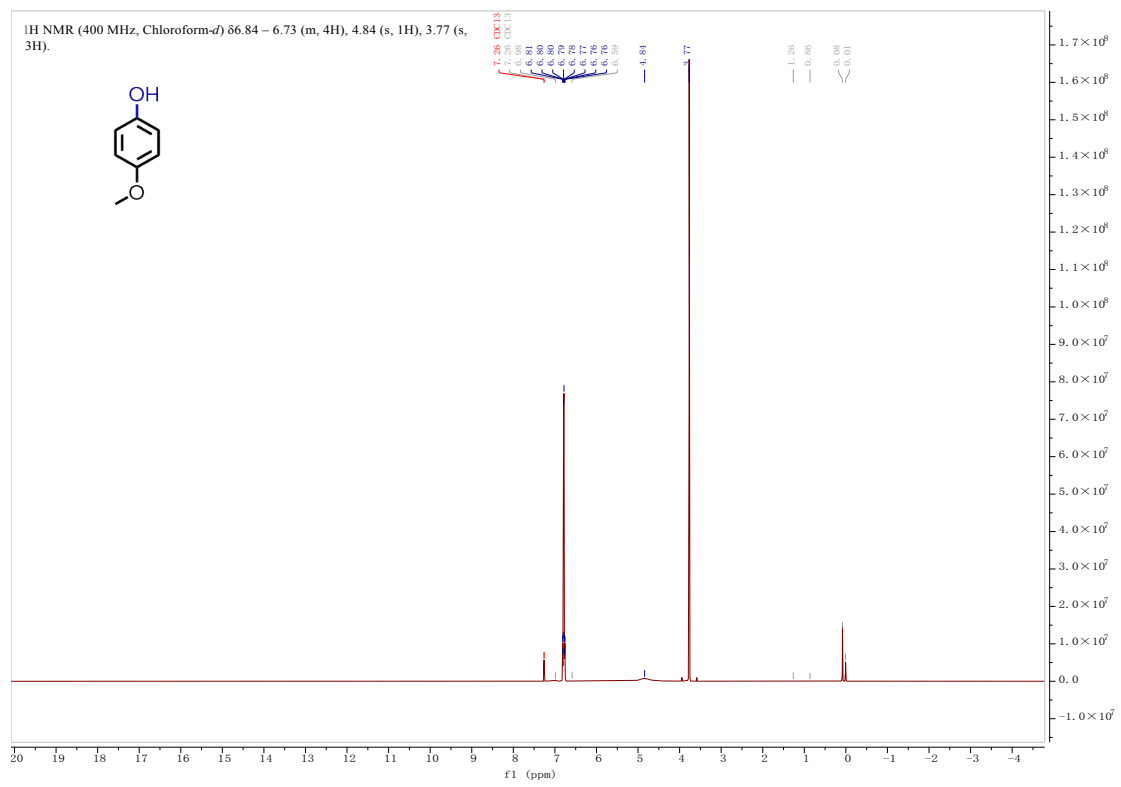

<sup>1</sup>H NMR (400 MHz, Chloroform-*d*)  $\delta$  7.96 – 7.88 (m, 2H), 6.98 – 6.89 (m, 3H), 2.58 (s, 3H).

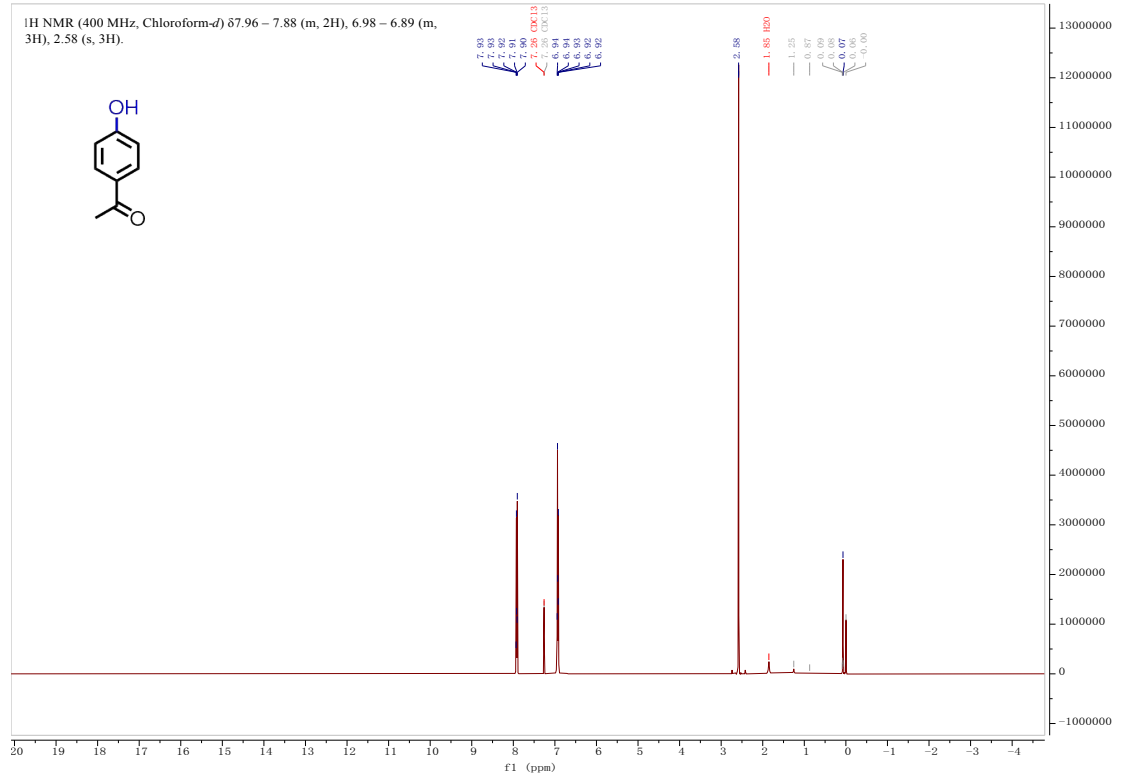

<sup>1</sup>H NMR (400 MHz, Chloroform-*d*) δ 8.00 – 7.92 (m, 2H), 6.90 – 6.82 (m, 2H), 5.61 (s, 1H), 3.89 (s, 3H).

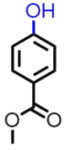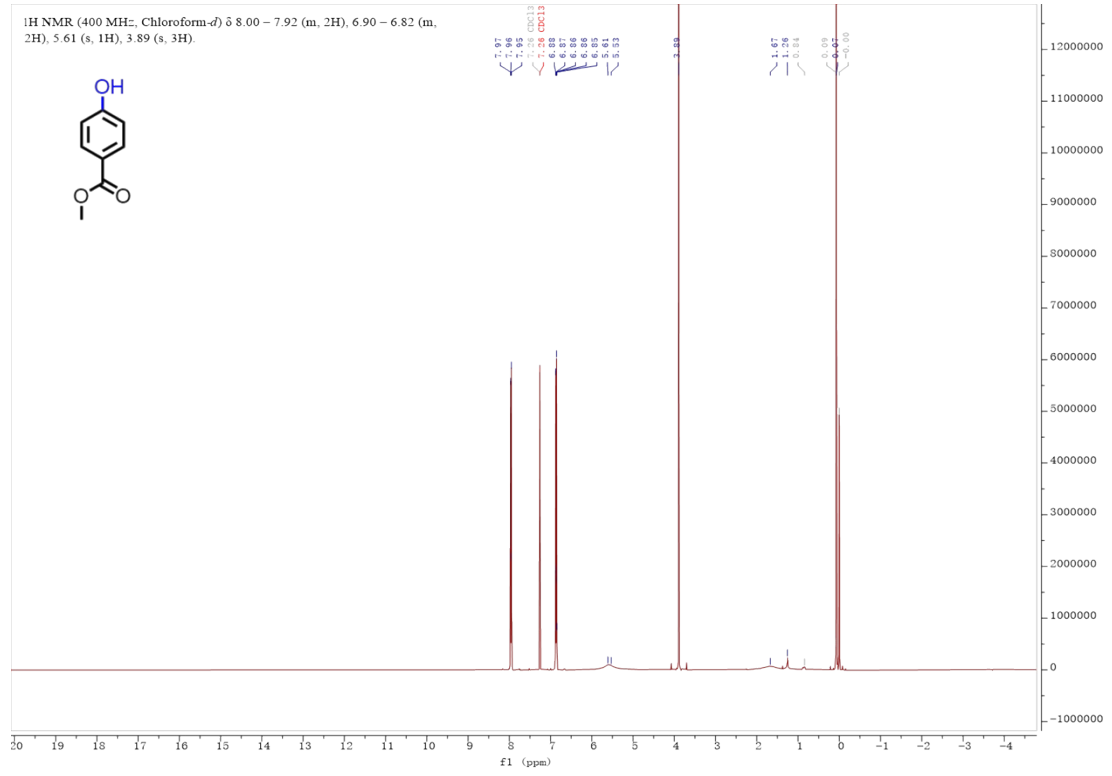

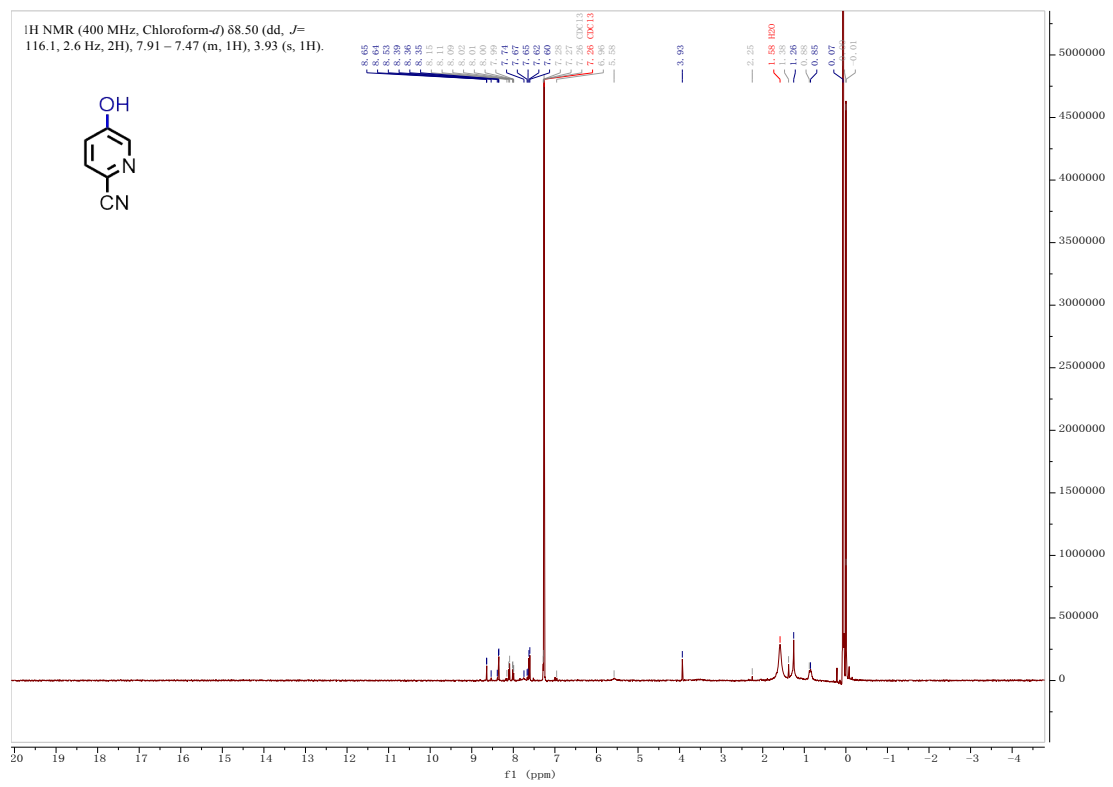

Supplement: d0gc02367a1.pdf [file d0gc02367a1.pdf]
